# Supplementary material
Source: Springer Nature journal article supplement (https://www.springermedizin.de/resource/supplementary/12990_2013_720_MOESM1_ESM.pdf/9612244)
Supplement: MOESM1 [file 9612244]

sham

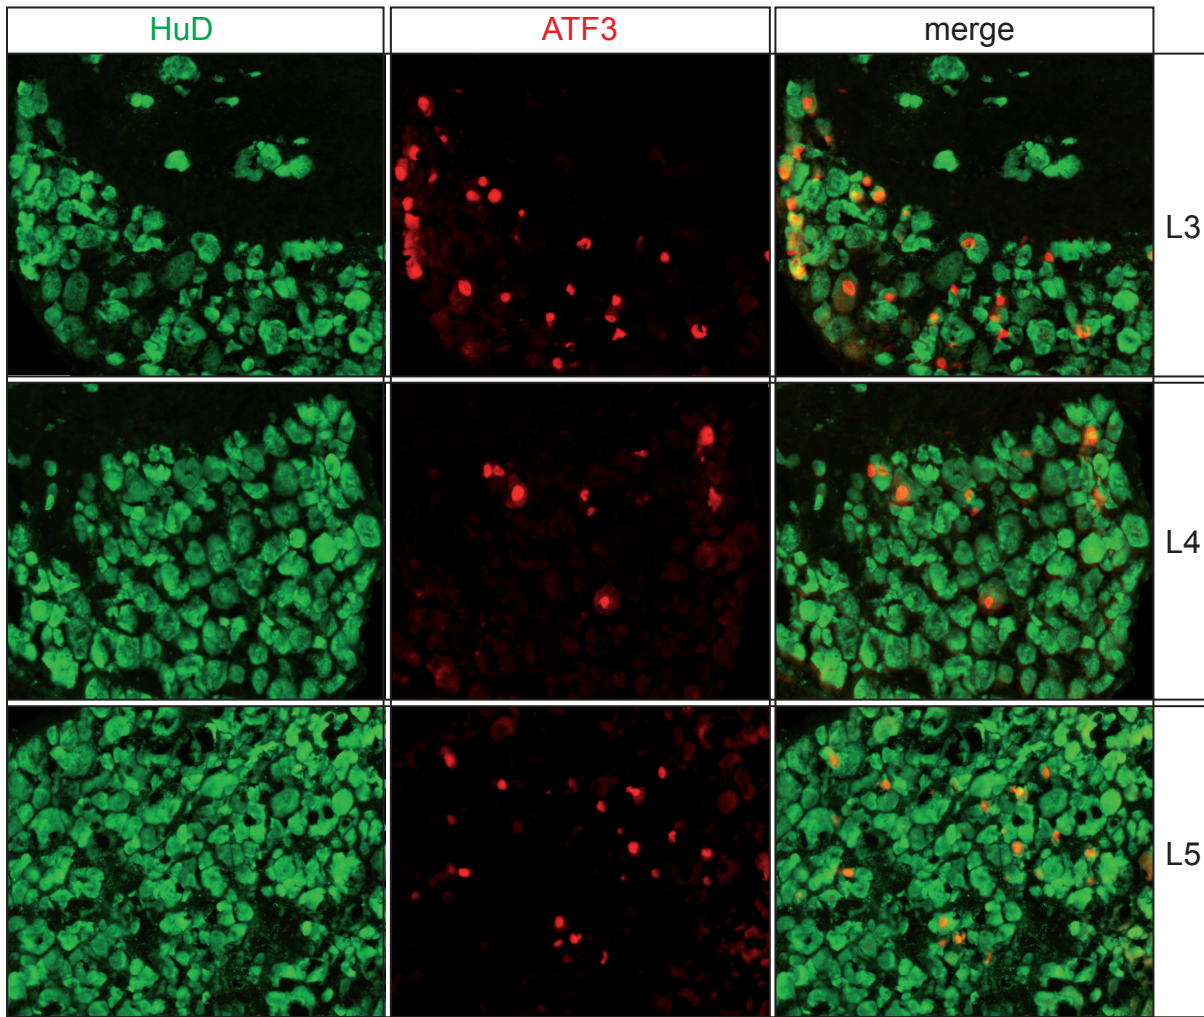

naïve

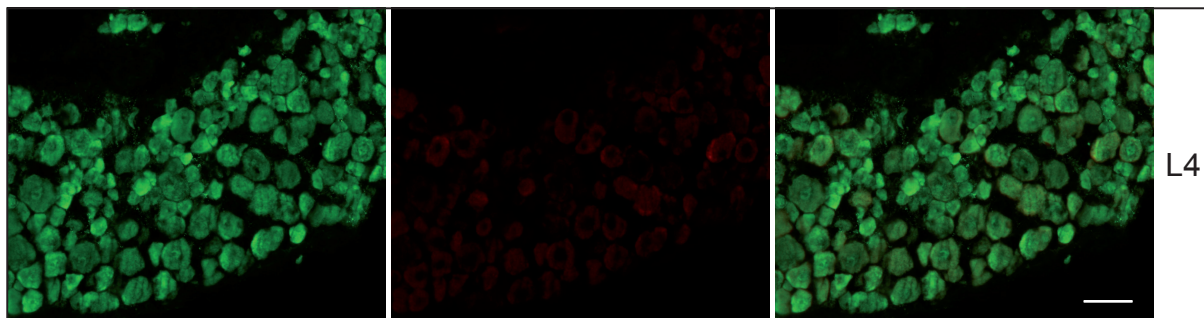

Supplemental Figure 1
